# Supplementary material for: Nature-Inspired Polymerization of Quercetin to Produce Antioxidant Nanoparticles with Controlled Size and Skin Tone-Matching Colors
Source: PubMed Central journal article supplement (PMC6864733; doi:10.3390/molecules24213815), 2019-10-23
Supplement: molecules-24-03815-s001.pdf [file molecules-24-03815-s001.pdf]

Supporting Information for:

# Nature-inspired Polymerization of Quercetin to Produce Antioxidant Nanoparticles with Controlled Size and Skin Tone Matching Colors

Suhair Sunoqrot <sup>1,\*</sup>, Eveen Al-Shalabi <sup>1</sup>, Lina Hasan Ibrahim <sup>1</sup> and Hiba Zalloum <sup>2</sup>

<sup>1</sup> Department of Pharmacy, Faculty of Pharmacy, Al-Zaytoonah University of Jordan, Amman 11733, Jordan

<sup>2</sup> Hamdi Mango Center for Scientific Research, University of Jordan, Amman 11942, Jordan

\* Correspondence: [suhair.sunoqrot@zuj.edu.jo](mailto:suhair.sunoqrot@zuj.edu.jo); Tel.: +962-6-4291511

**Table S1.** Characterization of the NPs prepared in this study.

| NP  | QCT: NaIO <sub>4</sub> | Particle Size (nm) | PDI         | Zeta Potential (mV) |
|-----|------------------------|--------------------|-------------|---------------------|
| NP1 | 1:1                    | 178.9 ± 35.1       | 0.14 ± 0.05 | -4.6 ± 2.3          |
| NP2 | 1:2                    | 177.4 ± 2.4        | 0.24 ± 0.14 | -3.0 ± 1.3          |
| NP3 | 1:3                    | 187.8 ± 19.0       | 0.34 ± 0.09 | -5.1 ± 2.0          |
| NP4 | 1:4                    | 202.6 ± 29.3       | 0.39 ± 0.07 | -1.4 ± 1.4          |

**Table S2.** QCT content by weight in QCT NPs measured by HPLC.

| Sample | QCT content (wt%) |
|--------|-------------------|
| NP1    | 0.080             |
| NP2    | 0.013             |
| NP3    | 0.010             |
| NP4    | 0.004             |

**Table S3.** Band I shifts in the UV-Vis spectra of QCT and QCT NPs upon the addition of various shift reagents.

| Sample | No addition | NaOMe        | AlCl <sub>3</sub> | AlCl <sub>3</sub> /HCl |
|--------|-------------|--------------|-------------------|------------------------|
| QCT    | 374 nm      | 426, 329* nm | 459 nm            | 430 nm                 |
| NP1    | 350 nm      | 430, 332* nm | 430 nm            | 430 nm                 |
| NP2    | 350 nm      | 430, 333* nm | 430 nm            | 430 nm                 |
| NP3    | 350 nm      | 430, 335* nm | 430 nm            | 430 nm                 |
| NP4    | 348 nm      | 425, 336* nm | 425 nm            | 425 nm                 |

\*New peak

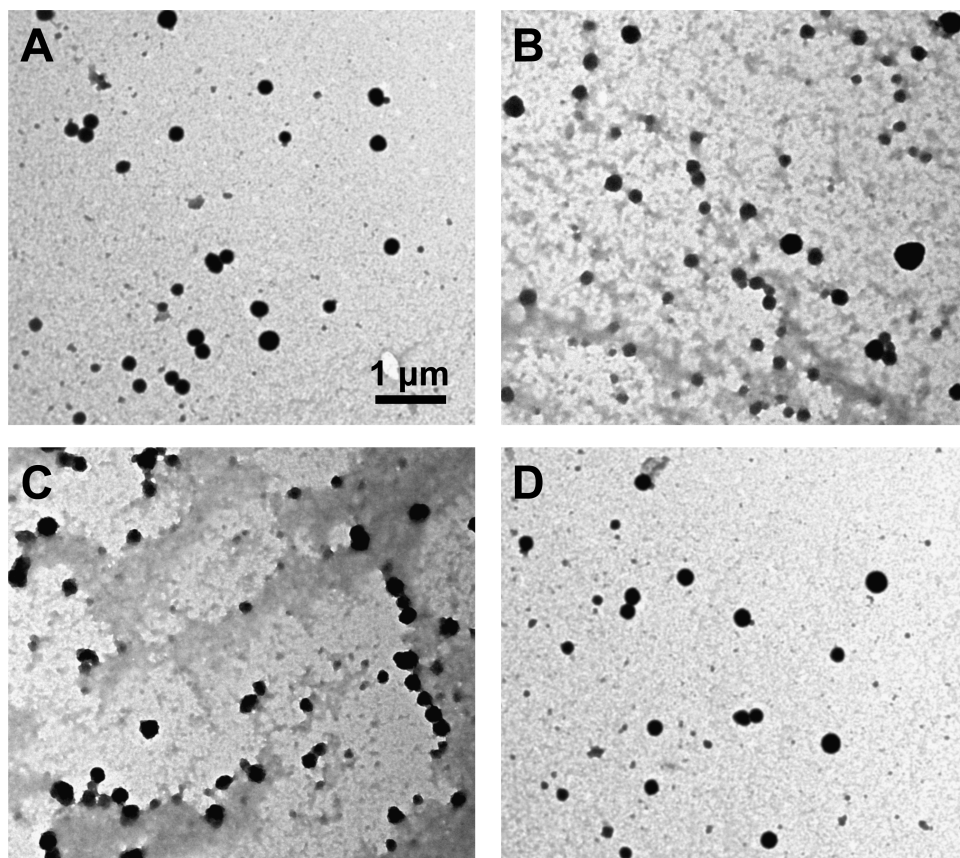

Figure S1. TEM images of (a) NP1, (b) NP2, (c) NP3, and (d) NP4.

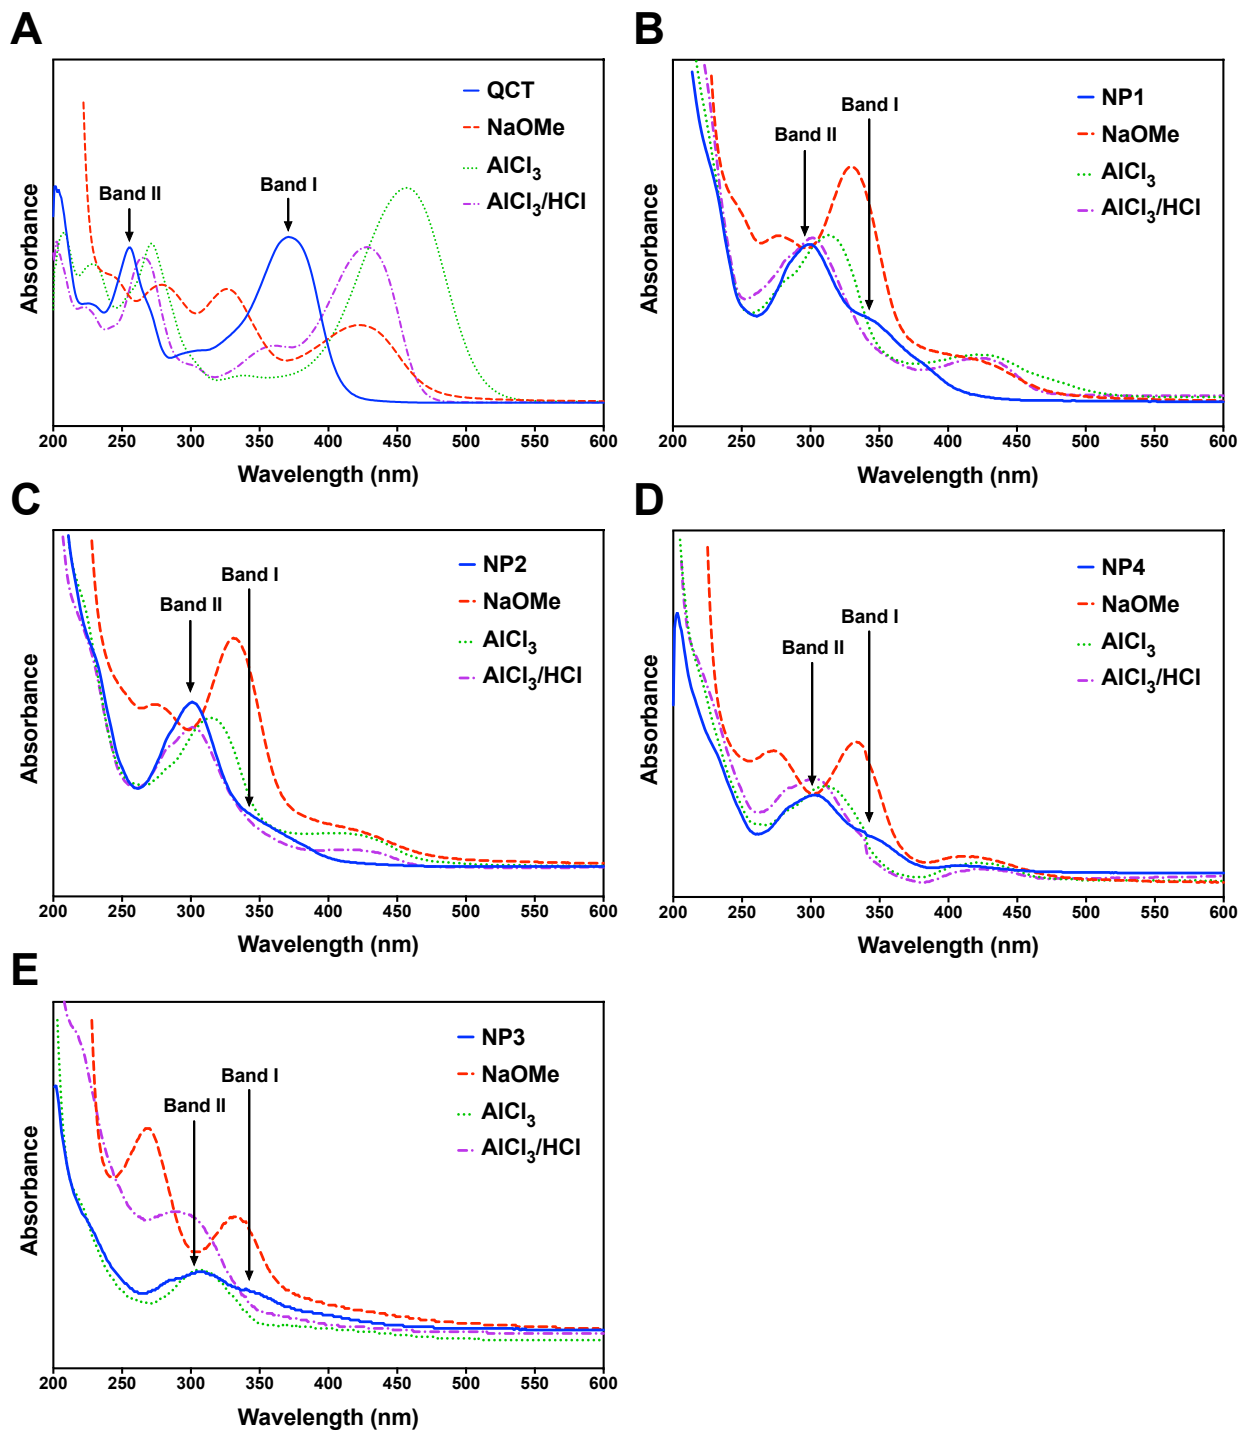

F

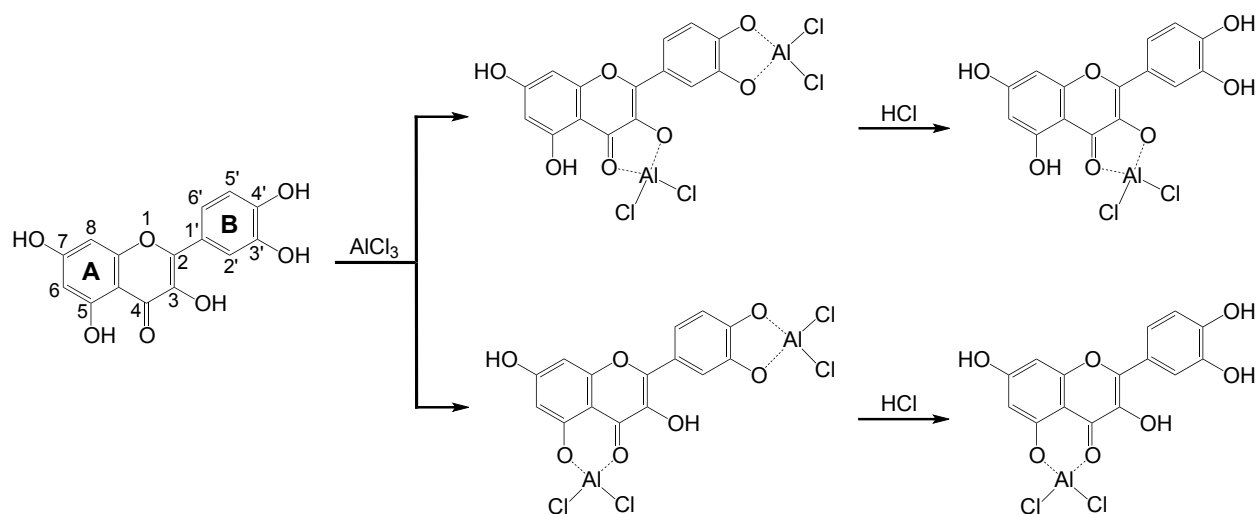

**Figure S2.** UV-Vis spectra of methanolic solutions of (a) QCT, (b) NP1, (c) NP2, (d) NP3, and (e) NP4 before and after the addition of NaOMe,  $\text{AlCl}_3$ , and  $\text{AlCl}_3/\text{HCl}$ ; (f) Types of complexes that can form between  $\text{AlCl}_3$  and QCT. Addition of NaOMe to QCT and QCT NPs causes a red shift in band I from 374 to 426 – 430 nm, confirming the presence of a free  $-\text{OH}$  at C3 in all samples. The appearance of a new peak at  $\sim 330$  nm indicates the presence of a free  $-\text{OH}$  group at C7. Complexation with  $\text{AlCl}_3$  causes a red shift in band I for all samples. If the 3',4'-dihydroxyl groups are available, the complex formed with  $\text{Al}^{+3}$  at that position can be dissociated upon the addition of HCl, resulting in partial shift in band I back to a lower wavelength. If the shift in band I upon the addition of  $\text{AlCl}_3$  is not affected by subsequent addition of HCl as in the case of QCT NPs, this means that the complex was formed between  $\text{Al}^{+3}$ , C4 carbonyl, and C3-OH and/or C5-OH only. This strongly indicates that at least one of the 3',4'-dihydroxyl groups on ring B has been oxidized, becoming unavailable for complexation with  $\text{AlCl}_3$ .

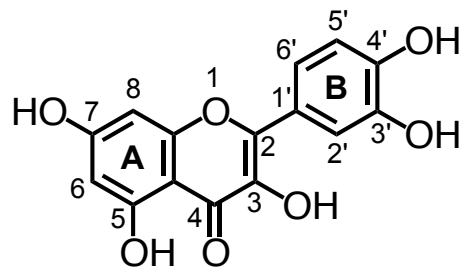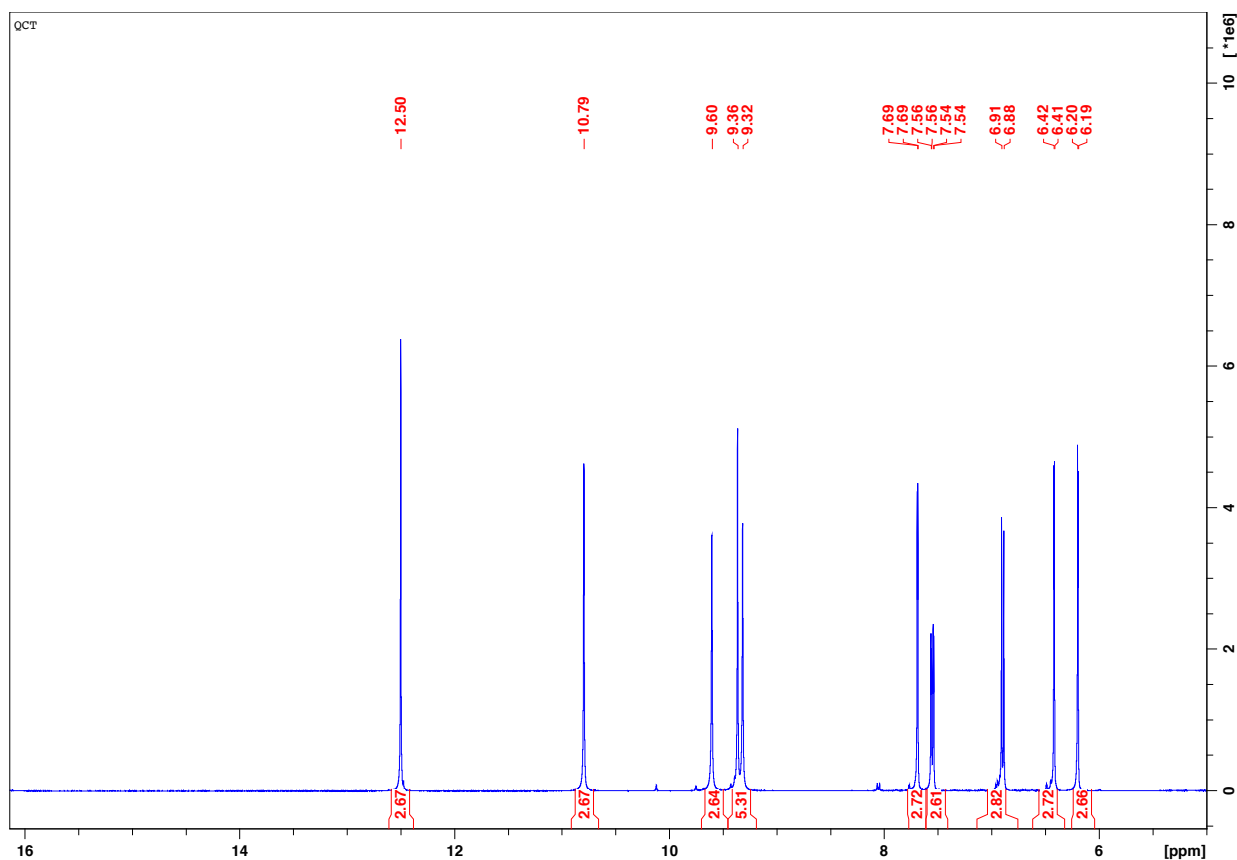

**Figure S3.**  $^1\text{H-NMR}$  spectrum of QCT (400 MHz,  $\text{DMSO-d}_6$ ).  $\delta$ : 6.20 (1H, d, H-6), 6.41 (1H, d, H-8), 6.91 (1H, d, H-5'), 7.54 (1H, d, H-6'), 7.69 (1H, s, H-2'); 9.32 (1H, s, C7-OH), 9.36 (1H, s, C3'-OH), 9.6 (1H, s, C4'-OH), 10.79 (1H, s, C3-OH), 12.50 (1H, s, C5-OH) ppm.

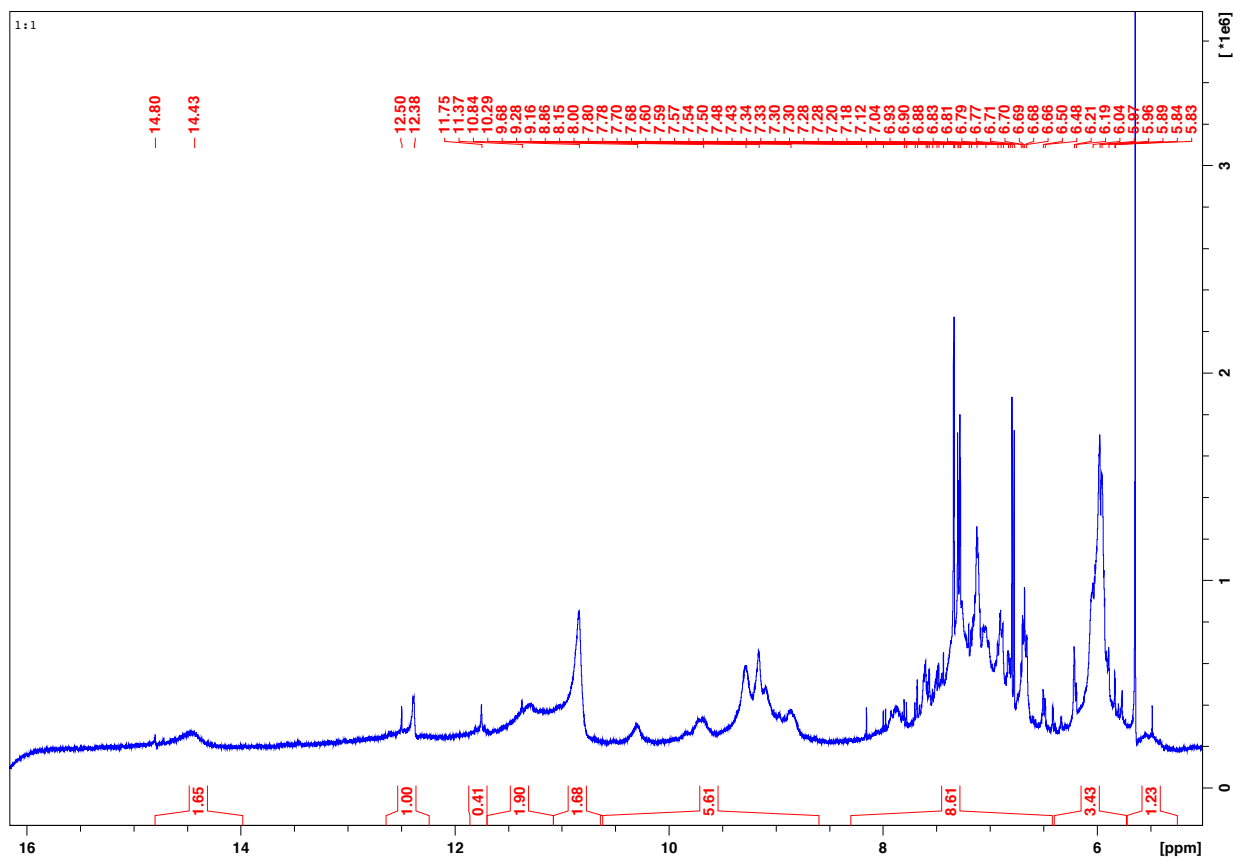

**Figure S4.**  $^1\text{H}$ -NMR spectrum of NP1 (400 MHz, DMSO- $d_6$ ).  $\delta$ : 5.97 – 6.48 (Ar-H, m, H-6, H-8), 6.71 – 7.33 (Ar-H, m, H-5', H-6', H-2'); 8.68 – 9.28 (–OH, m, C7-OH, C4'-OH, C3'-OH), 10.75 – 11.49 (–OH, m, C3-OH), 12.35 – 12.51 (–OH, m, C5-OH) ppm.

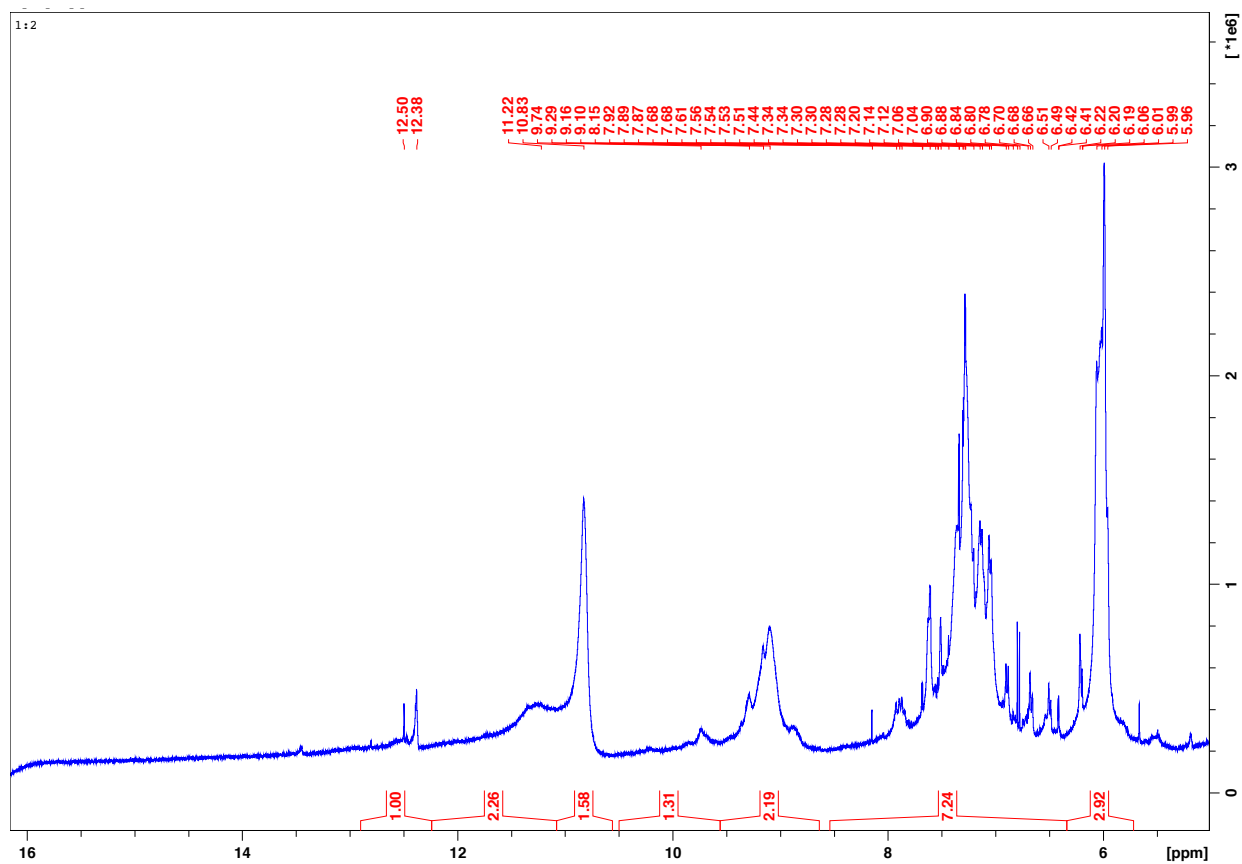

**Figure S5.**  $^1\text{H-NMR}$  spectrum of NP2 (400 MHz, DMSO- $d_6$ ).  $\delta$ : 5.75 – 6.40 (Ar-H, m, H-6, H-8), 6.99 – 7.30 (Ar-H, m, H-5', H-6', H-2'); 8.65 – 9.55 (–OH, m, C7-OH, C4'-OH, C3'-OH), 10.70 – 11.50 (–OH, m, C3-OH), 12.36 – 12.65 (–OH, m, C5-OH) ppm.

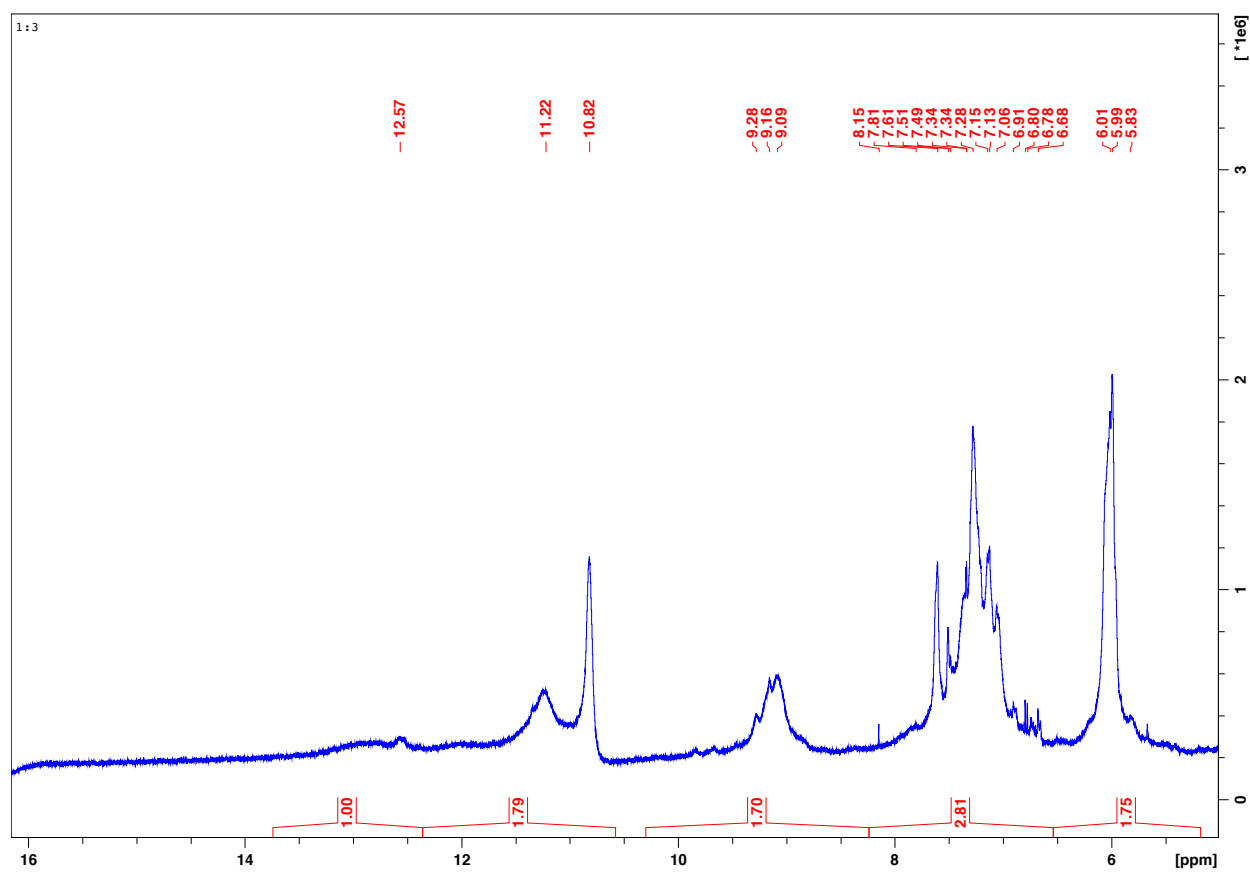

**Figure S6.**  $^1\text{H-NMR}$  spectrum of NP3 (400 MHz,  $\text{DMSO-d}_6$ ).  $\delta$ : 5.99 (Ar-H, d, H-6, H-8), 6.90 – 7.70 (Ar-H, m, H-5', H-6', H-2'); 9.09 – 9.28 (–OH, m, C7-OH, C4'-OH, C3'-OH), 10.70 – 11.50 (–OH, m, C3-OH), 12.40 – 13.40 (–OH, m, C5-OH) ppm.



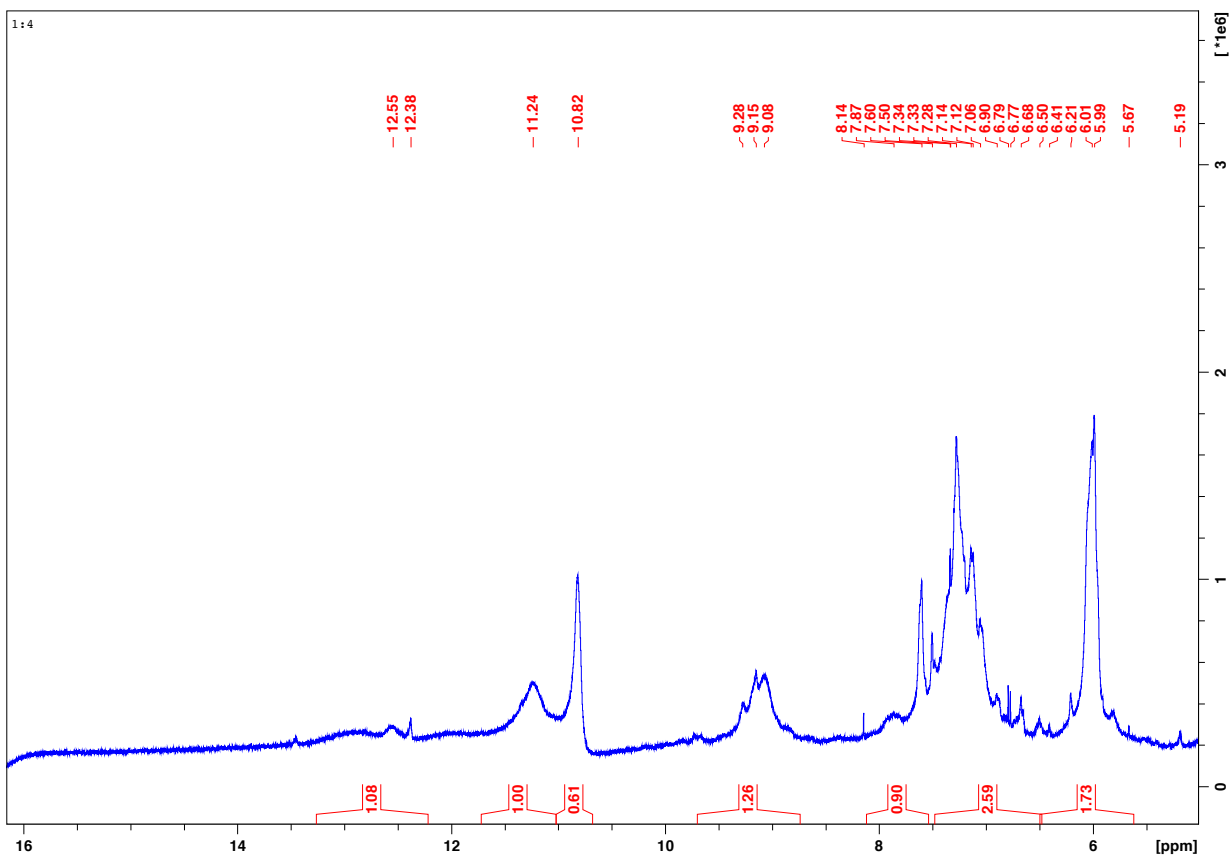

**Figure S7.**  $^1\text{H}$ -NMR spectrum of NP4 (400 MHz,  $\text{DMSO-d}_6$ ).  $\delta$ : 5.99 (Ar-H, d, H-6, H-8), 6.80 – 7.75 (Ar-H, m, H-5', H-6', H-2'); 9.08 – 9.28 (–OH, m, C7-OH, C4'-OH, C3'-OH), 10.75 – 11.50 (–OH, m, C3-OH), 12.37 – 12.70 (–OH, m, C5-OH) ppm.

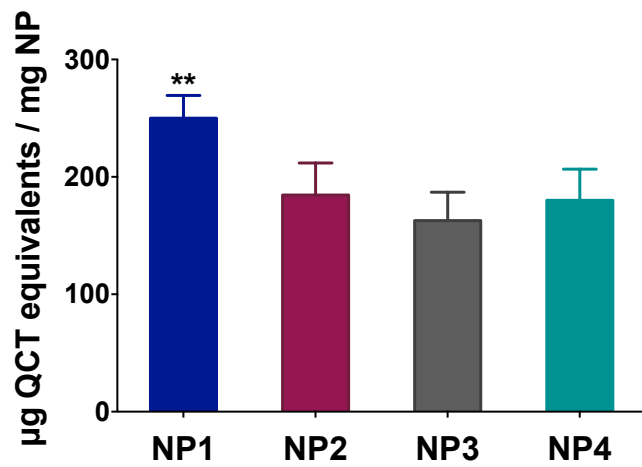

**Figure S8.** Total phenol content in QCT NPs expressed as µg QCT equivalents per mg NP.

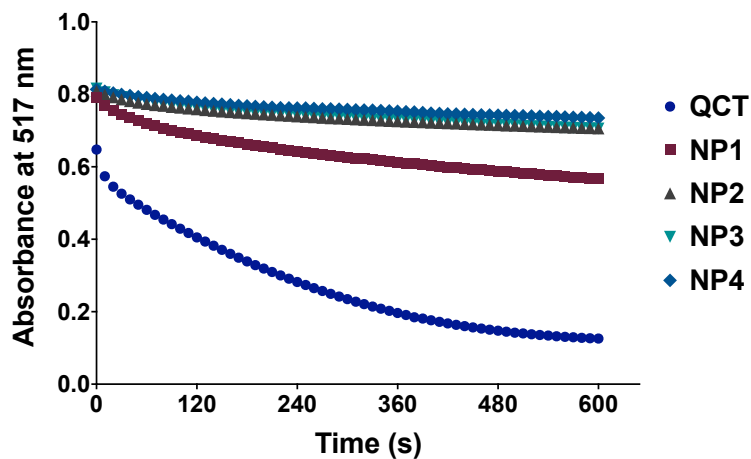

**Figure S9.** DPPH radical scavenging kinetics of QCT NPs compared to unmodified QCT over the first 10 min of the reaction. One hundred micrograms of each material was dissolved in 200  $\mu$ L ethanol and added to 4 mL DPPH (0.1 mM in ethanol). The UV absorbance at 517 nm was immediately recorded at 10-second intervals up to 10 min.
